# Supplementary material for: Increased acetylation of Peroxiredoxin1 by HDAC6 inhibition leads to recovery of Aβ-induced impaired axonal transport
Source: Springer Nature journal article supplement (doi:10.1186/s13024-017-0164-1), 2017-02-28
Supplement: MOESM1 [file 12097050]

|                | <b>Age</b> | <b>Sex</b> | <b>Braack stage</b> |
|----------------|------------|------------|---------------------|
| <b>Normal:</b> |            |            |                     |
| 1              | 101        | F          | I                   |
| 2              | 78         | F          | II                  |
| <b>AD:</b>     |            |            |                     |
| 1              | 100        | F          | V                   |
| 2              | 79         | F          | VI                  |
