# Supplementary material for: Increased acetylation of Peroxiredoxin1 by HDAC6 inhibition leads to recovery of Aβ-induced impaired axonal transport
Source: Springer Nature journal article supplement (doi:10.1186/s13024-017-0164-1), 2017-02-28

IP: Flag

IB: Ac-prx1  
(R2-31)

N.C.

Prx1-**WT**-Flag

Prx1-**WT**-Flag  
+TBA

Prx1-**K197R**-Flag

Prx1-**K197R**-Flag  
+TBA

40

30

20

15

IB: Flag

Ac-tub

$\alpha$ -tub

Flag

$\beta$ -actin

Input

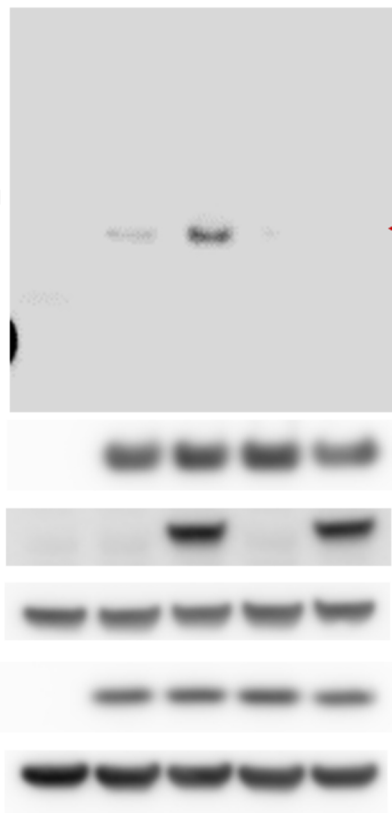

Supplement: MOESM2 [file 12097050]
