# Supplementary material for: Increased acetylation of Peroxiredoxin1 by HDAC6 inhibition leads to recovery of Aβ-induced impaired axonal transport
Source: Springer Nature journal article supplement (doi:10.1186/s13024-017-0164-1), 2017-02-28

**a**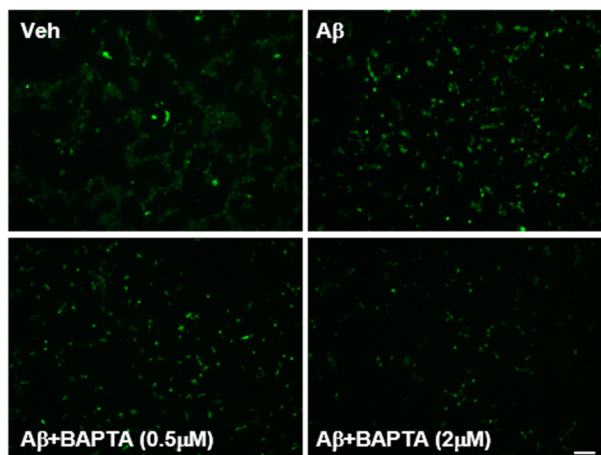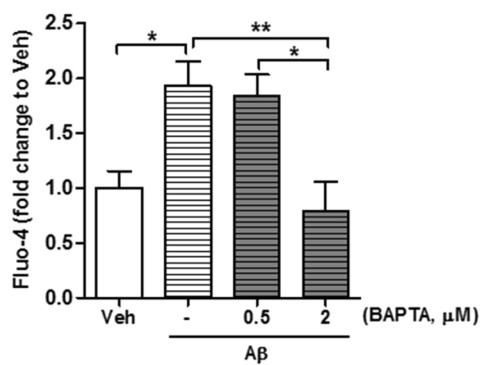**b**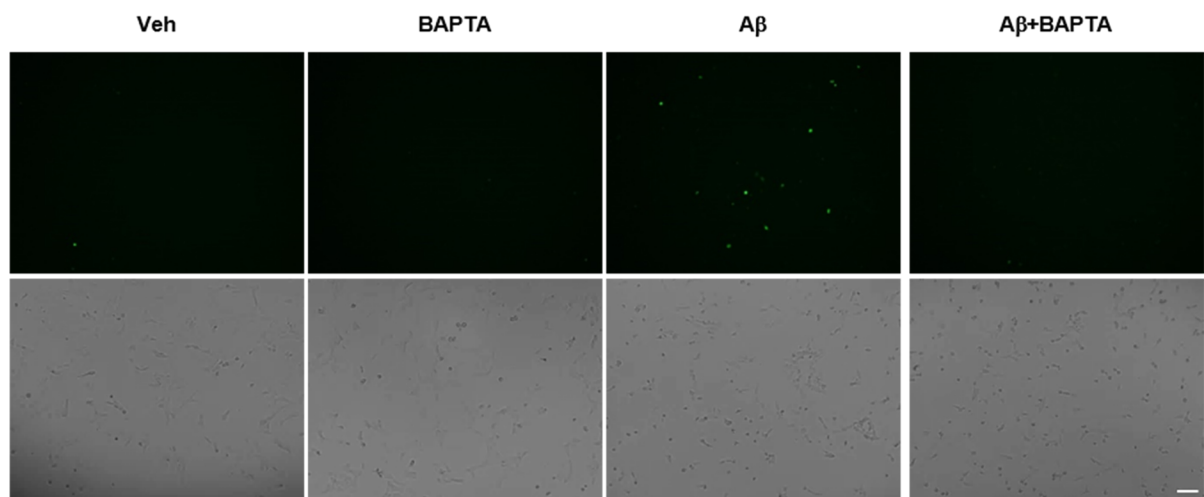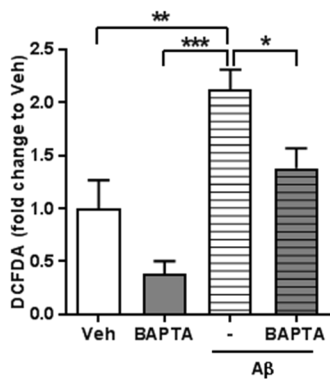

Supplement: MOESM5 [file 12097050]
